# Supplementary material for: Evaluation of Data-Driven and Process-Based Real-Time Flow Forecasting Techniques for Informing Operation of Surface Water Abstraction
Source: Atypon-hosted journal article supplement (doi:10.1061/(asce)wr.1943-5452.0001397), 2021-04-30
Supplement: supplemental_material_wr.1943-5452.0001397_yassin.pdf [file supplemental_material_wr.1943-5452.0001397_yassin.pdf]

## SUPPLEMENTAL MATERIALS

*ASCE Journal of Water Resources Planning and Management*

# Evaluation of Data-Driven and Process-Based Real-Time Flow Forecasting Techniques for Informing Operation of Surface Water Abstraction

Mohammed Yassin, Alemayehu Asfaw, Vanessa Speight, and  
James D. Shucksmith

**DOI:** 10.1061/(ASCE)WR.1943-5452.0001397

© ASCE 2021

[www.ascelibrary.org](http://www.ascelibrary.org)

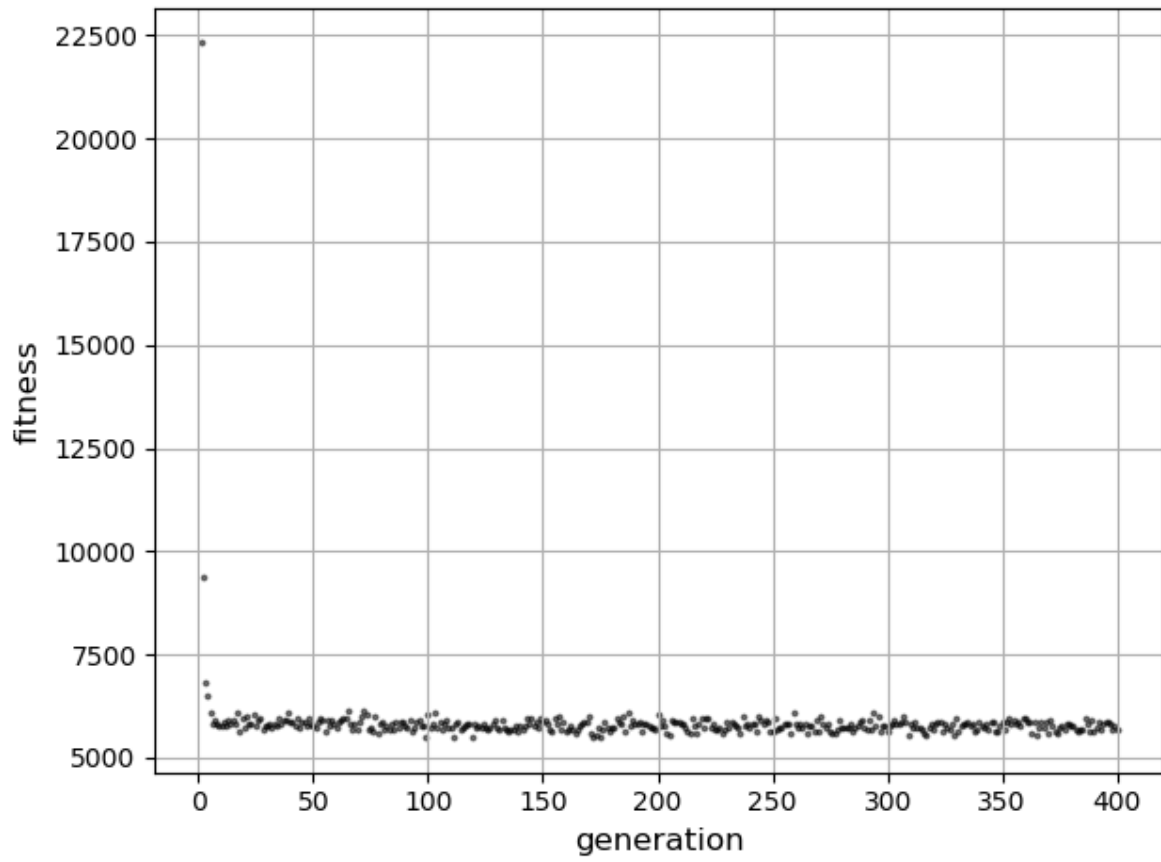

Fig. S1 A convergence plot demonstrating the performance of the GA algorithm over its runtime.
